# Supplementary material for: Stereo/regio-selective access to substituted 3-hydroxy-oxindoles with anti-proliferative assessment and in silico validation
Source: Royal Society of Chemistry journal article supplement (doi:10.1039/d3ra05869g), 2023-01-01

## Stereo/regio-selective access to substituted 3-hydroxy-oxindoles with anti-proliferative assessment and *in-silico* validation†

Preeti,<sup>a</sup> Asif Raza,<sup>b</sup> Amit Anand,<sup>c</sup> Natacha Henry,<sup>d</sup> Arun K. Sharma,<sup>b</sup> Pascal Roussel,<sup>d</sup> Vipin Kumar<sup>a\*</sup>

<sup>a</sup>Department of Chemistry, Guru Nanak Dev University, Amritsar, India

<sup>b</sup>Department of Pharmacology, Penn State Cancer Institute, The Pennsylvania State University College of Medicine, Hershey, PA 17033

<sup>c</sup>Department of Chemistry, Khalsa College, Amritsar, India

<sup>d</sup>Univ. Lille, CNRS, Centrale Lille, Univ. Artois, UMR 8181, Unité de Catalyse et Chimie du Solide (UCCS), F-59000 Lille, France

### Contents

1. Physicochemical and ADMET properties of compounds 4a, 4d, 4j and 4m
2. Scanned copies of <sup>1</sup>H and <sup>13</sup>C-NMR spectra of few representative compounds

Table S1: Physicochemical and ADMET properties of compounds 4a, 4d, 4j and 4m.

|                                                        | 4a     | 4d     | 4j     | 4m     |
|--------------------------------------------------------|--------|--------|--------|--------|
| <b>Absorption</b>                                      |        |        |        |        |
| Water solubility (log mol/L)                           | -2.855 | -3.124 | -3.411 | -2.252 |
| Caco2 permeability (log Papp in 10 <sup>-6</sup> cm/s) | 1.189  | 0.886  | 0.885  | 1.117  |
| Intestinal absorption (human) (% Absorbed)             | 93.868 | 92.941 | 91.328 | 86.619 |
| Skin permeability (log Kp)                             | -2.745 | -2.746 | -2.746 | -2.745 |
| P-glycoprotein substrate                               | Yes    | Yes    | Yes    | No     |
| P-glycoprotein I inhibitor                             | No     | No     | Yes    | No     |
| P-glycoprotein II inhibitor                            | Yes    | Yes    | Yes    | No     |
| <b>Metabolism</b>                                      |        |        |        |        |
| CYP2D6 inhibitor                                       | Yes    | Yes    | Yes    | Yes    |
| CYP3A4 inhibitor                                       | Yes    | Yes    | Yes    | No     |
| CYP1A2 inhibitor                                       | Yes    | No     | No     | No     |
| CYP2C19 Inhibitor                                      | No     | No     | No     | No     |
| CYP2C9 inhibitor                                       | No     | No     | No     | No     |
| CYP2D6 inhibitor                                       | Yes    | Yes    | No     | No     |
| CYP3A4 inhibitor                                       | No     | No     | No     | No     |
| <b>Excretion</b>                                       |        |        |        |        |
| Total Clearance (log ml/min/kg)                        | 1.059  | 0.972  | 0.591  | 1.093  |
| Renal OCT2 substrate                                   | No     | No     | No     | No     |
| <b>Distribution</b>                                    |        |        |        |        |
| VDss (human) (log L/kg)                                | 1.066  | 1.098  | 1.065  | 0.08   |
| BBB permeability (log BB)                              | 0.042  | 0.011  | -0.04  | -0.244 |
| Fraction unbound (human) (Fu)                          | 0.206  | 0.23   | 0.261  | 0.728  |
| CNS permeability (log PS)                              | -2.55  | -2.414 | -2.266 | -2.965 |
| <b>Toxicity</b>                                        |        |        |        |        |

|                                          |        |        |        |        |
|------------------------------------------|--------|--------|--------|--------|
| Oral Rat Acute Toxicity (LD50) (mol/kg)  | 2.772  | 2.866  | 2.942  | 2.851  |
| Hepatotoxicity                           | Yes    | No     | Yes    | No     |
| Skin Sensitisation                       | No     | No     | No     | No     |
| <i>T. Pyriformis</i> toxicity (log ug/L) | 0.305  | 0.31   | 0.312  | 0.258  |
| Minnow toxicity (log mM)                 | 1.762  | 1.123  | 0.616  | 2.401  |
| <b>Molecular weight</b>                  | 338.40 | 417.30 | 496.19 | 248.28 |
| <b>Log<math>P_{o/w}</math></b>           | 1.7532 | 2.5157 | 3.2782 | 0.1585 |
| <b>TPSA (Å)</b>                          | 53.01  | 53.01  | 53.01  | 61.80  |
| <b>No. of rotatable bonds</b>            | 4      | 4      | 4      | 2      |
| <b>No. of HBA</b>                        | 4      | 4      | 4      | 4      |
| <b>No. of HBD</b>                        | 1      | 1      | 1      | 1      |
| <b>Molar refractivity</b>                | 101.98 | 109.68 | 117.38 | 72.60  |

2. Scanned copies of  $^1\text{H}$  and  $^{13}\text{C}$  NMR spectra:

1.  $^1\text{H}$  NMR 1-Benzyl-3-hydroxy-3-(morpholinomethyl)indolin-2-one (**4a**).

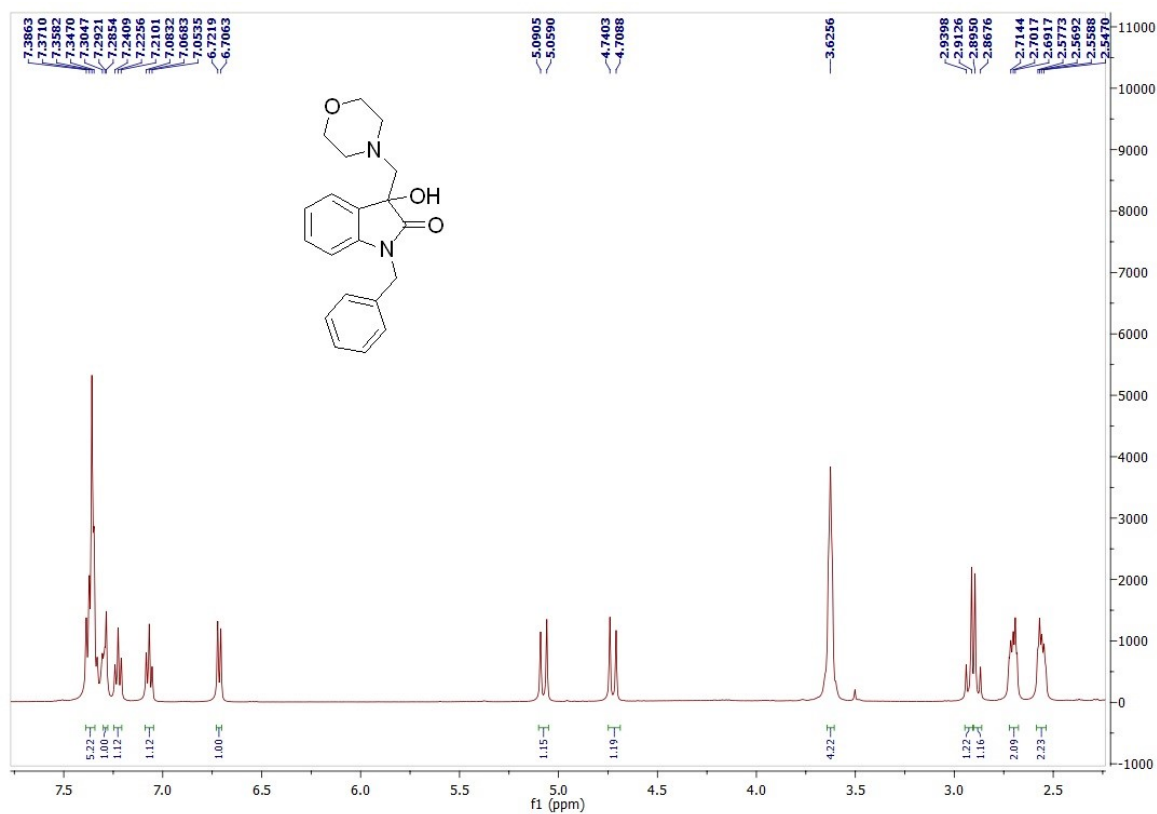

2. <sup>13</sup>C NMR 1-Benzyl-3-hydroxy-3-(morpholinomethyl)indolin-2-one (**4a**)

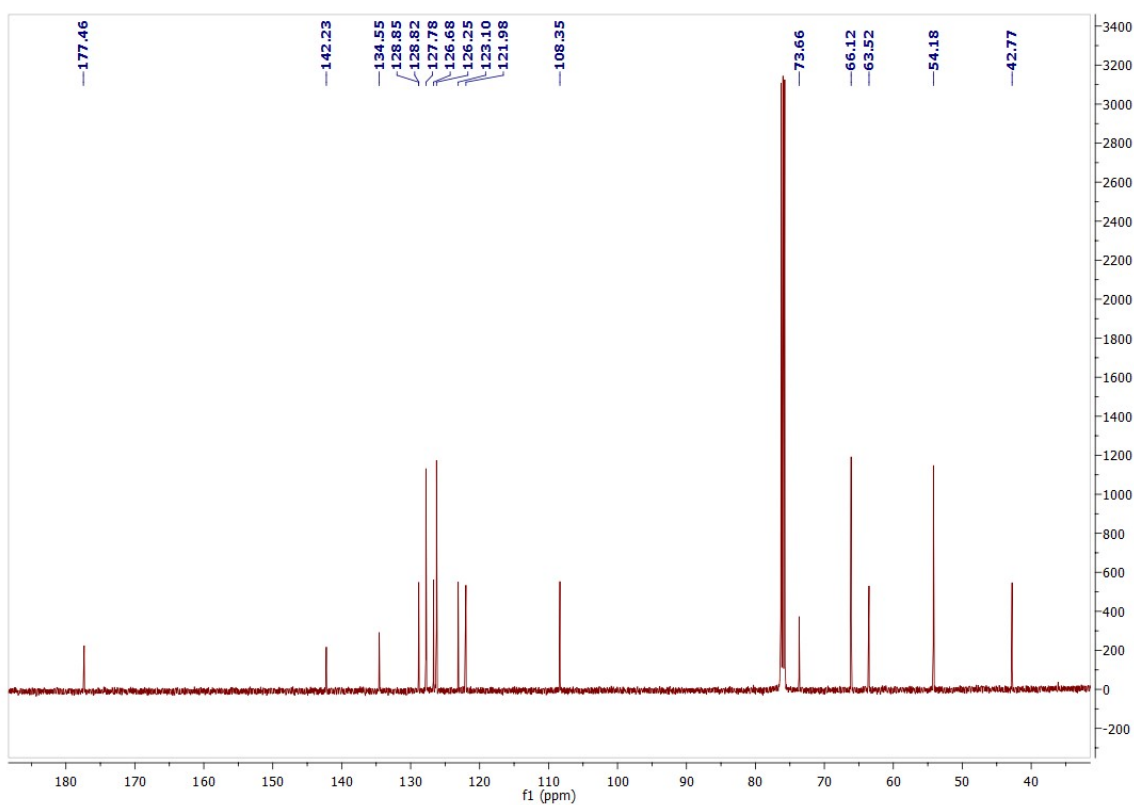

3. <sup>1</sup>H NMR 1-Benzyl-3-hydroxy-3-(piperidin-1-ylmethyl)indolin-2-one (**4b**)

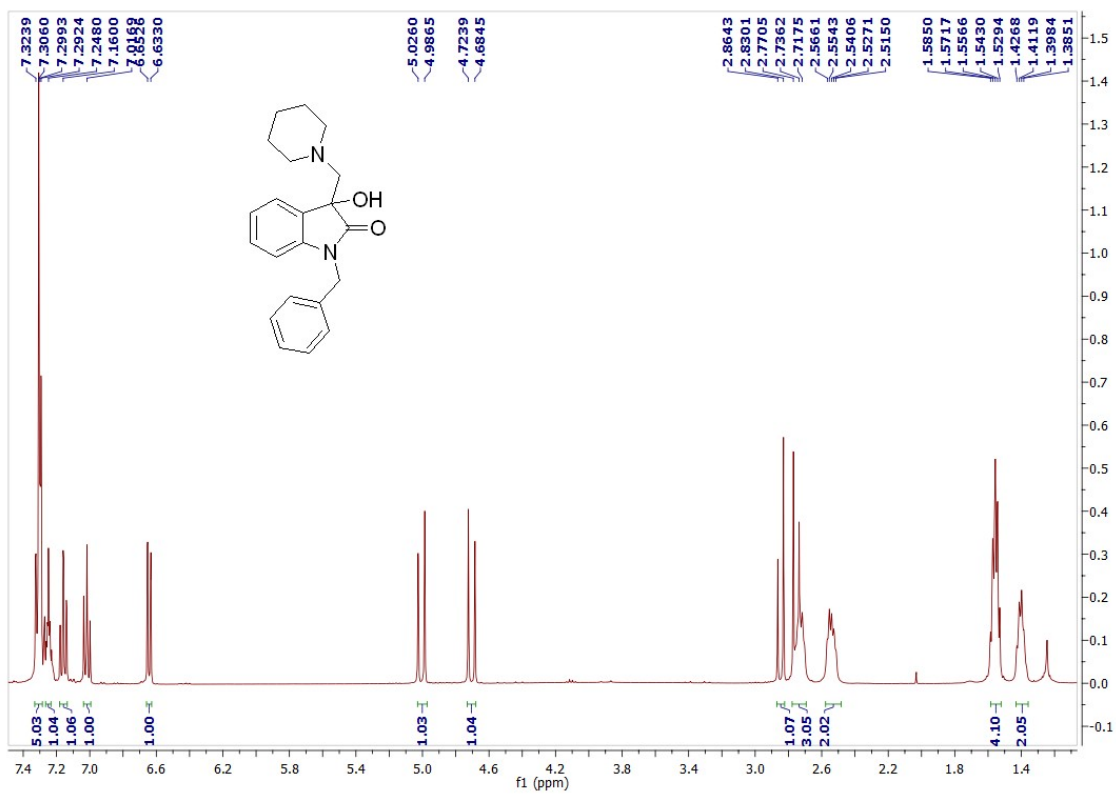

4. <sup>13</sup>C NMR 1-Benzyl-3-hydroxy-3-(piperidin-1-ylmethyl)indolin-2-one (**4b**)

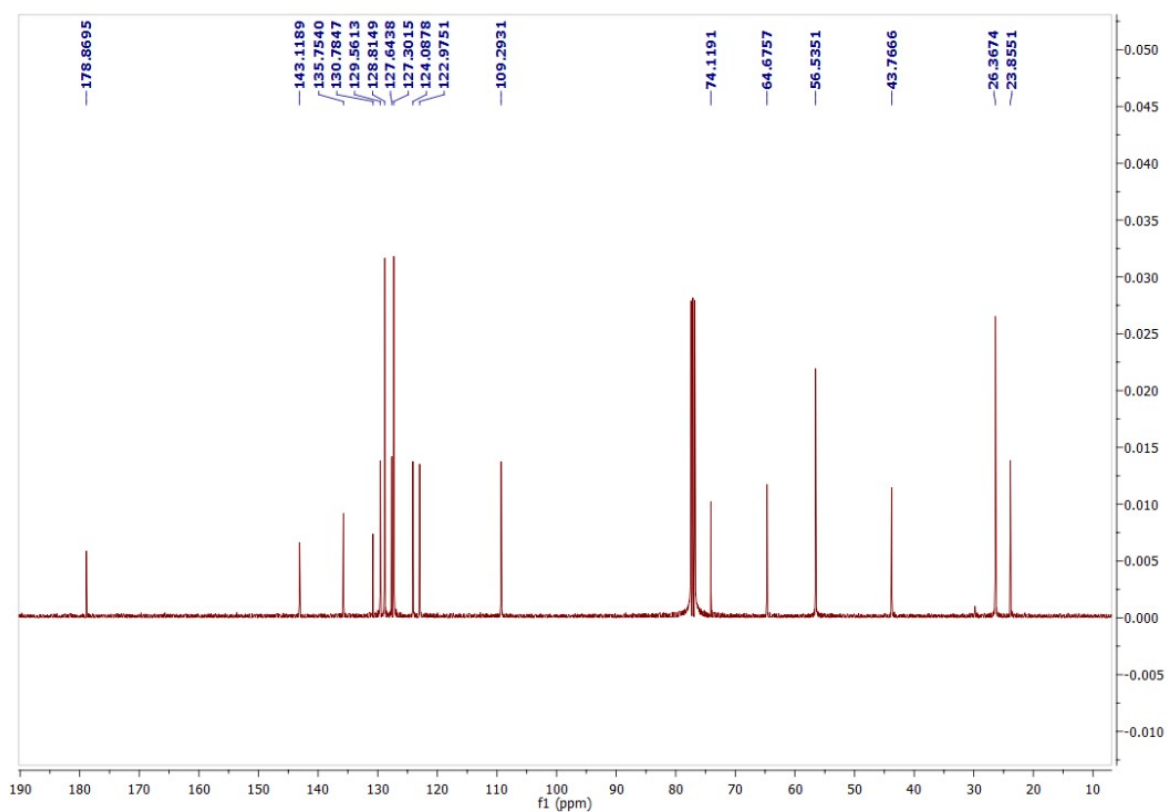

5. <sup>1</sup>H NMR 1-Benzyl-3-hydroxy-3-(pyrrolidin-1-ylmethyl)indolin-2-one (**4c**)

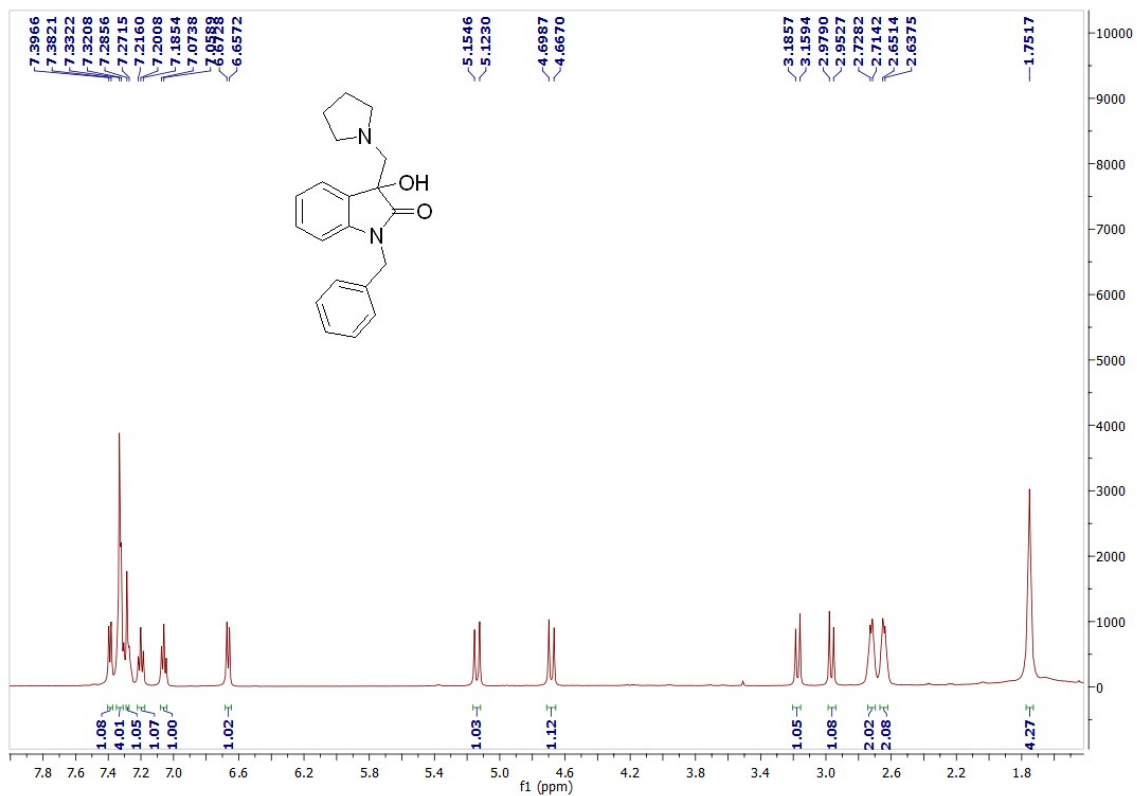

6.  $^{13}\text{C}$  NMR 1-Benzyl-3-hydroxy-3-(pyrrolidin-1-ylmethyl)indolin-2-one (**4c**)

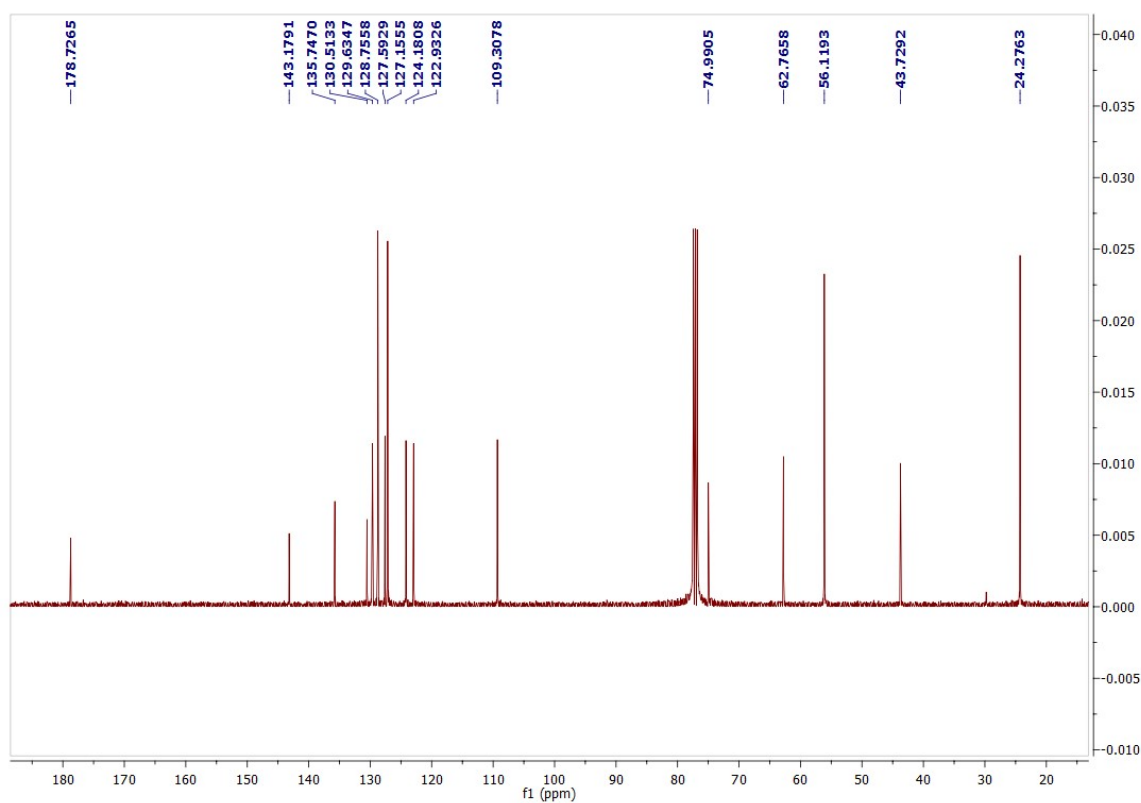

7.  $^1\text{H}$  NMR 1-Benzyl-5-bromo-3-hydroxy-3-(morpholinomethyl)indolin-2-one (**4d**)

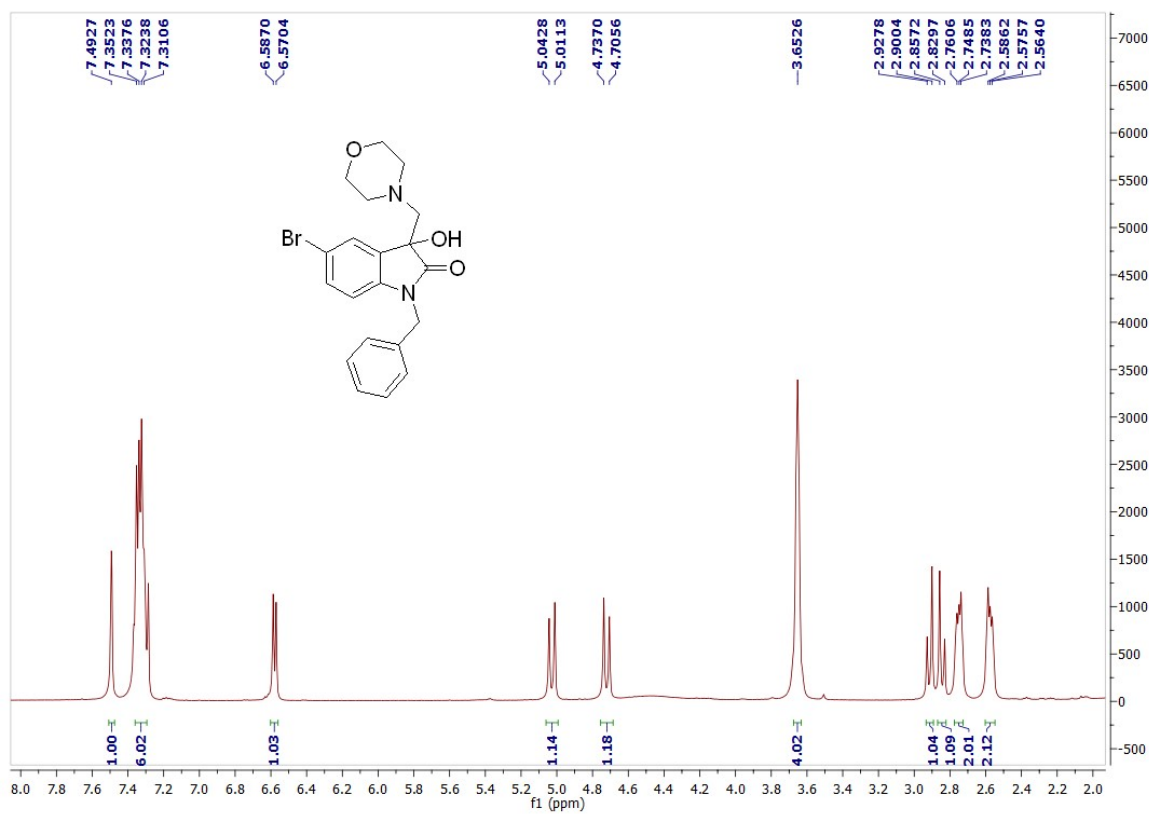

8.  $^{13}\text{C}$  NMR 1-Benzyl-5-bromo-3-hydroxy-3-(morpholinomethyl)indolin-2-one (**4d**)

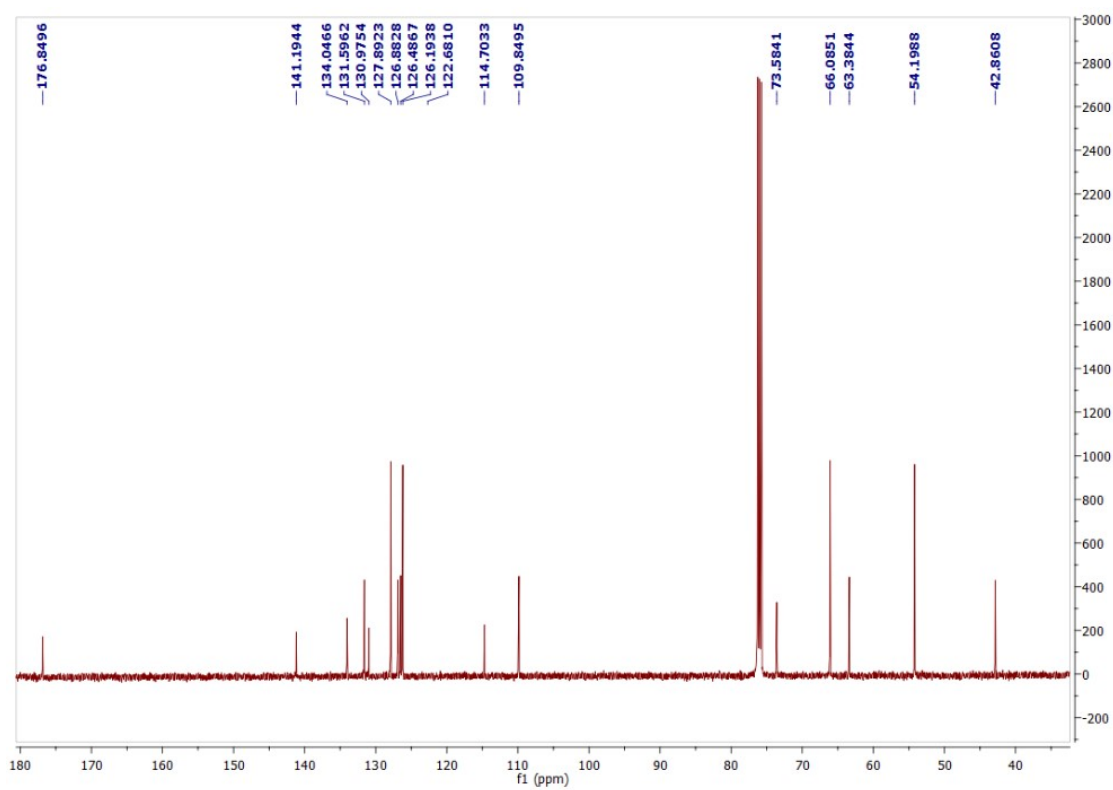

9.  $^1\text{H}$  NMR 1-Benzyl-5-bromo-3-hydroxy-3-(piperidin-1-ylmethyl)indolin-2-one (**4e**)

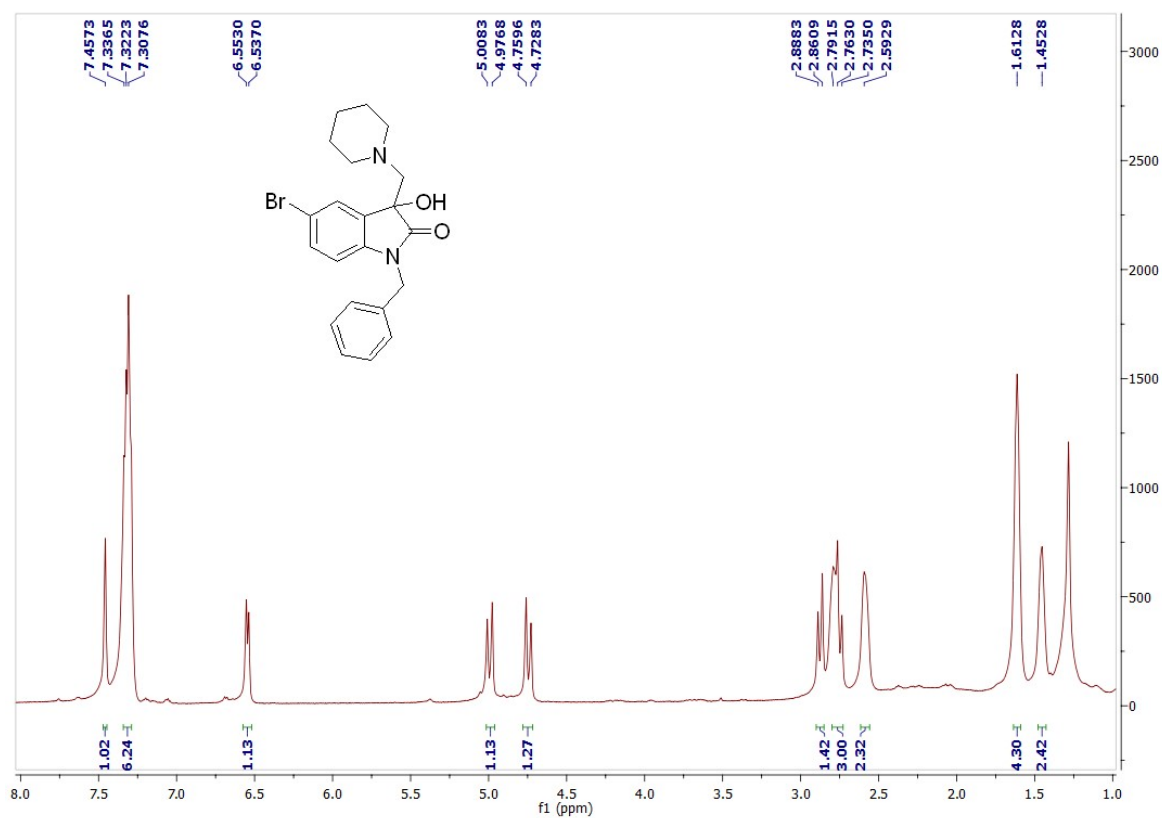

10. <sup>13</sup>C NMR 1-Benzyl-5-bromo-3-hydroxy-3-(piperidin-1-ylmethyl)indolin-2-one (**4e**)

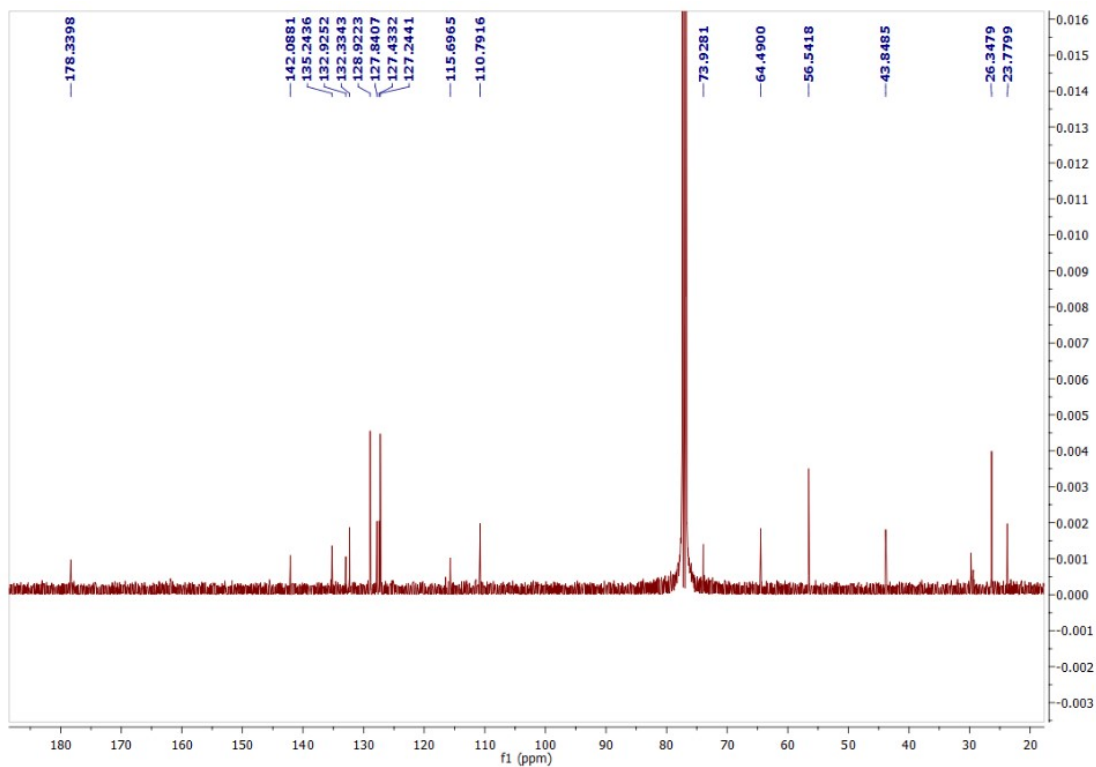

11. <sup>1</sup>H NMR 1-Benzyl-5-bromo-3-hydroxy-3-(pyrrolidin-1-ylmethyl)indolin-2-one (**4f**)

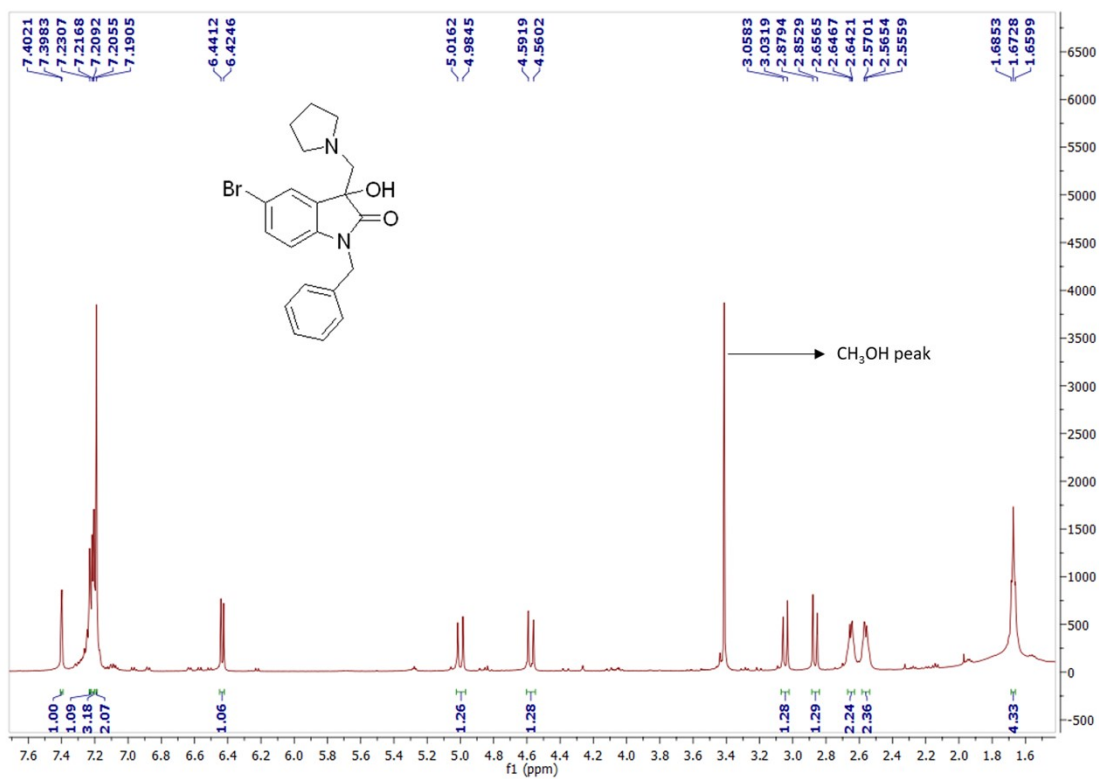

12.  $^{13}\text{C}$  NMR 1-Benzyl-5-bromo-3-hydroxy-3-(pyrrolidin-1-ylmethyl)indolin-2-one (**4f**)

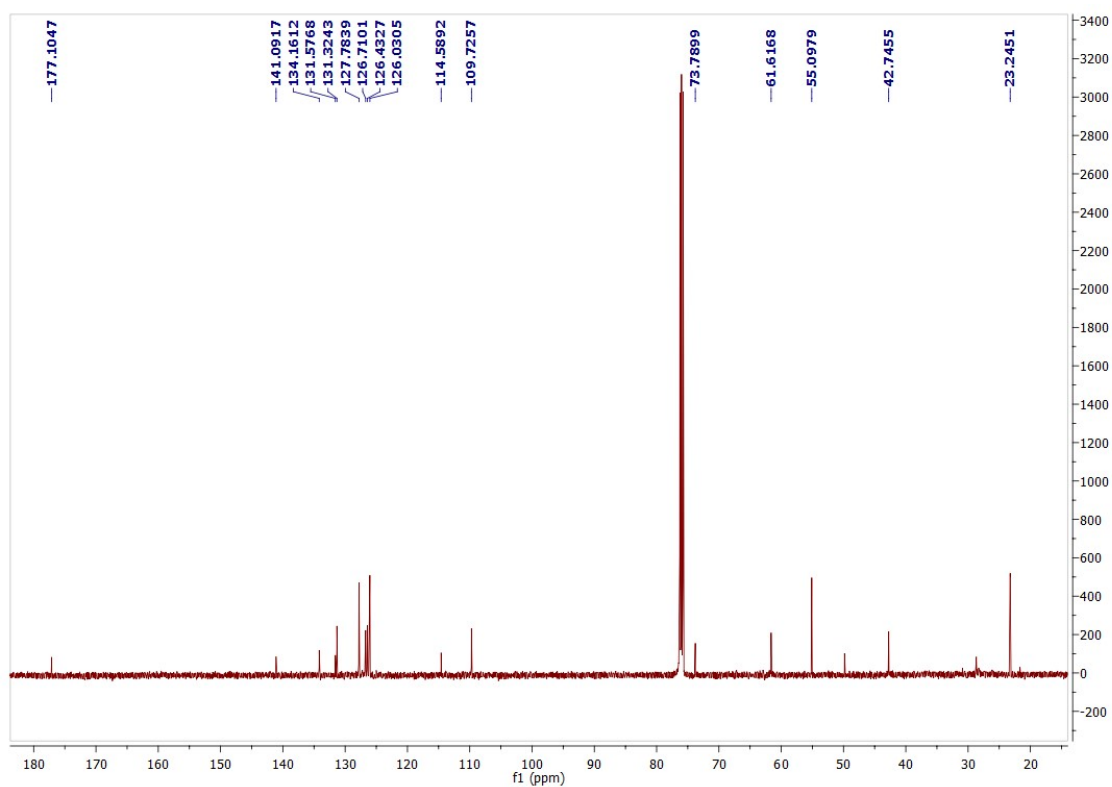

13.  $^1\text{H}$  NMR 1-Benzyl-5-chloro-3-hydroxy-3-(morpholinomethyl)indolin-2-one (**4g**)

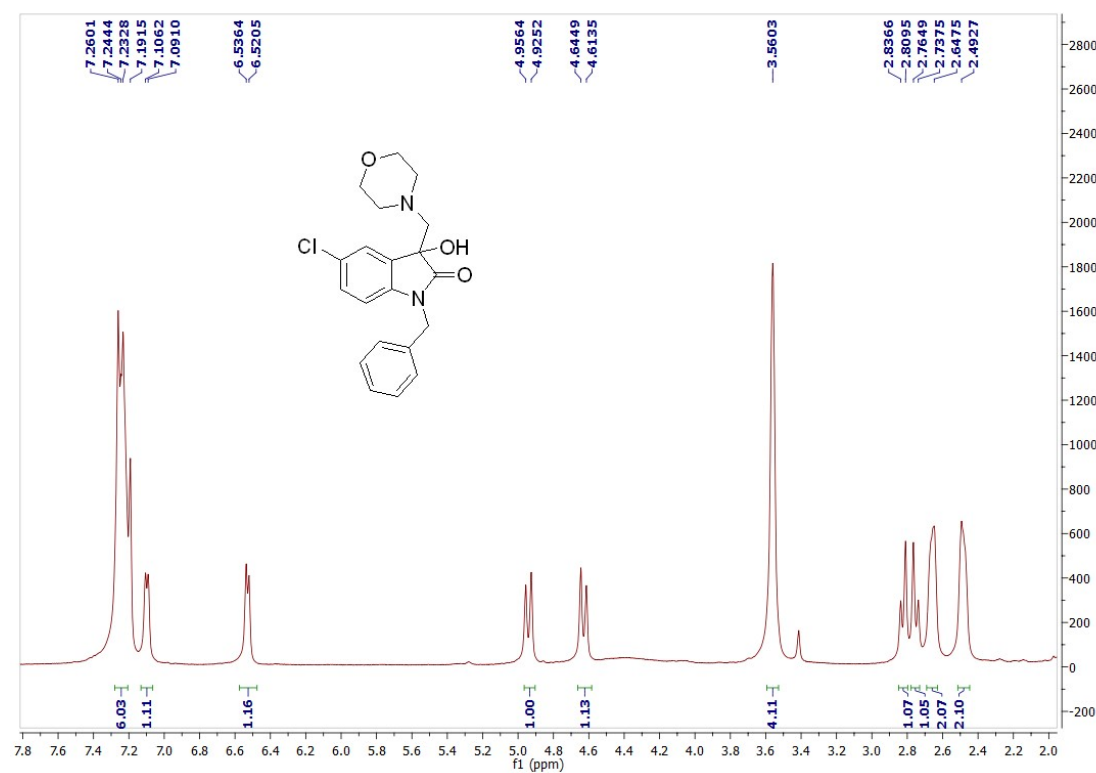



14.  $^{13}\text{C}$  NMR 1-Benzyl-5-chloro-3-hydroxy-3-(morpholinomethyl)indolin-2-one (**4g**)

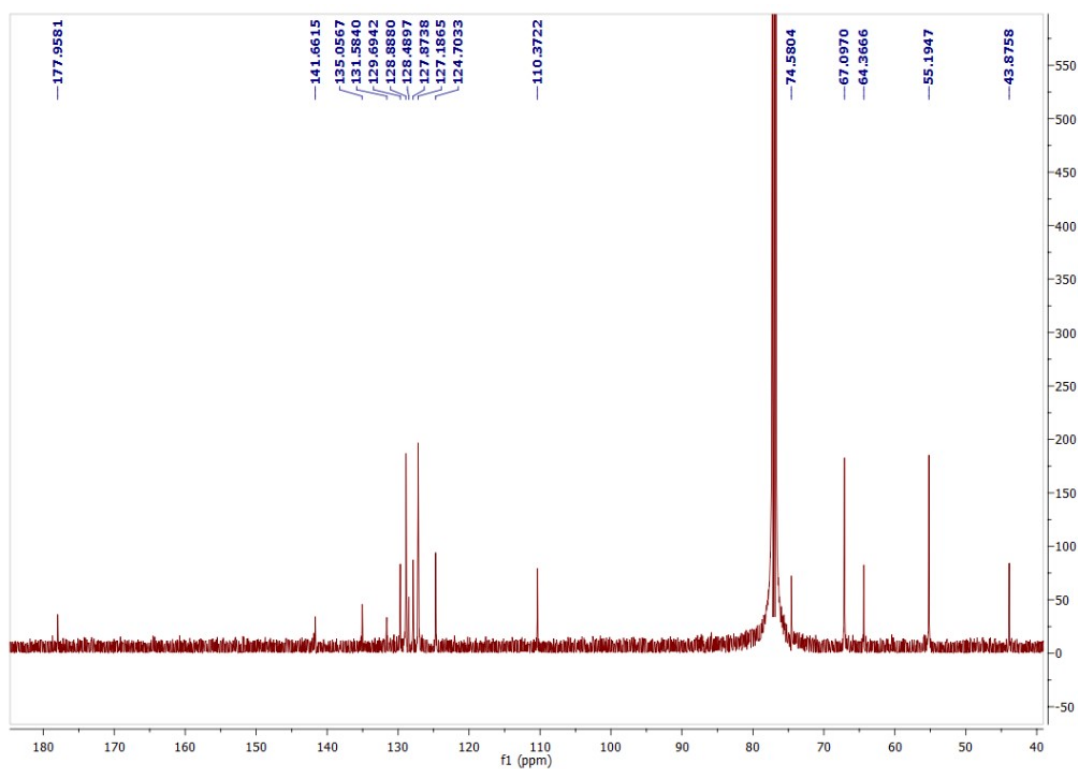

15.  $^1\text{H}$  NMR 1-Benzyl-5-chloro-3-hydroxy-3-(pyrrolidin-1-ylmethyl)indolin-2-one (**4i**)

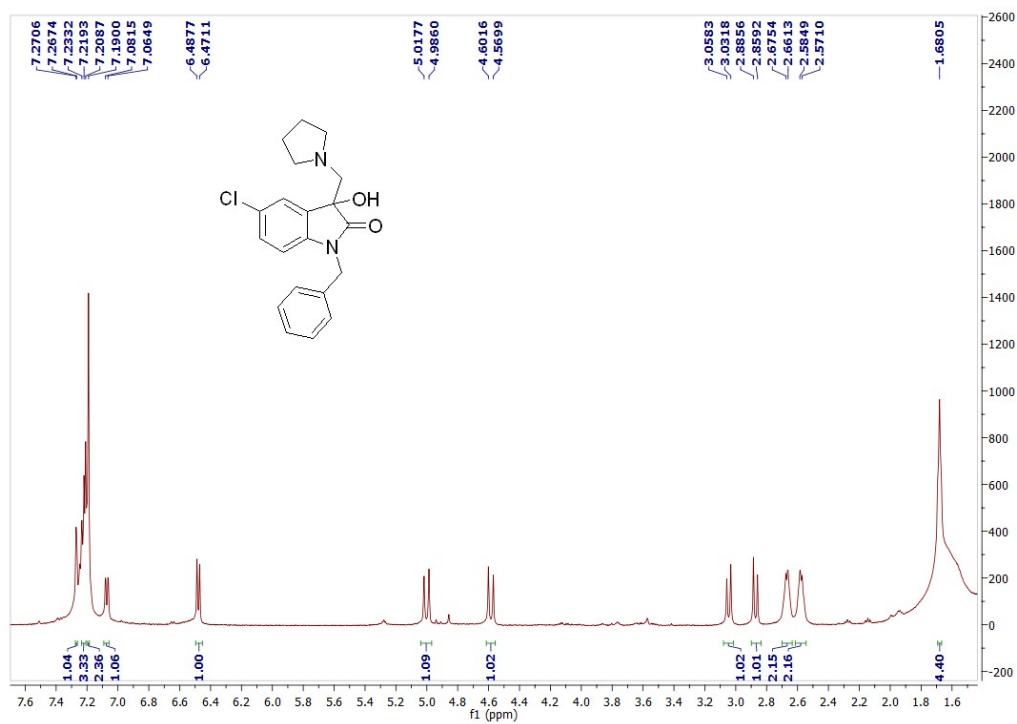

16. <sup>13</sup>C NMR 1-Benzyl-5-chloro-3-hydroxy-3-(pyrrolidin-1-ylmethyl)indolin-2-one (**4i**)

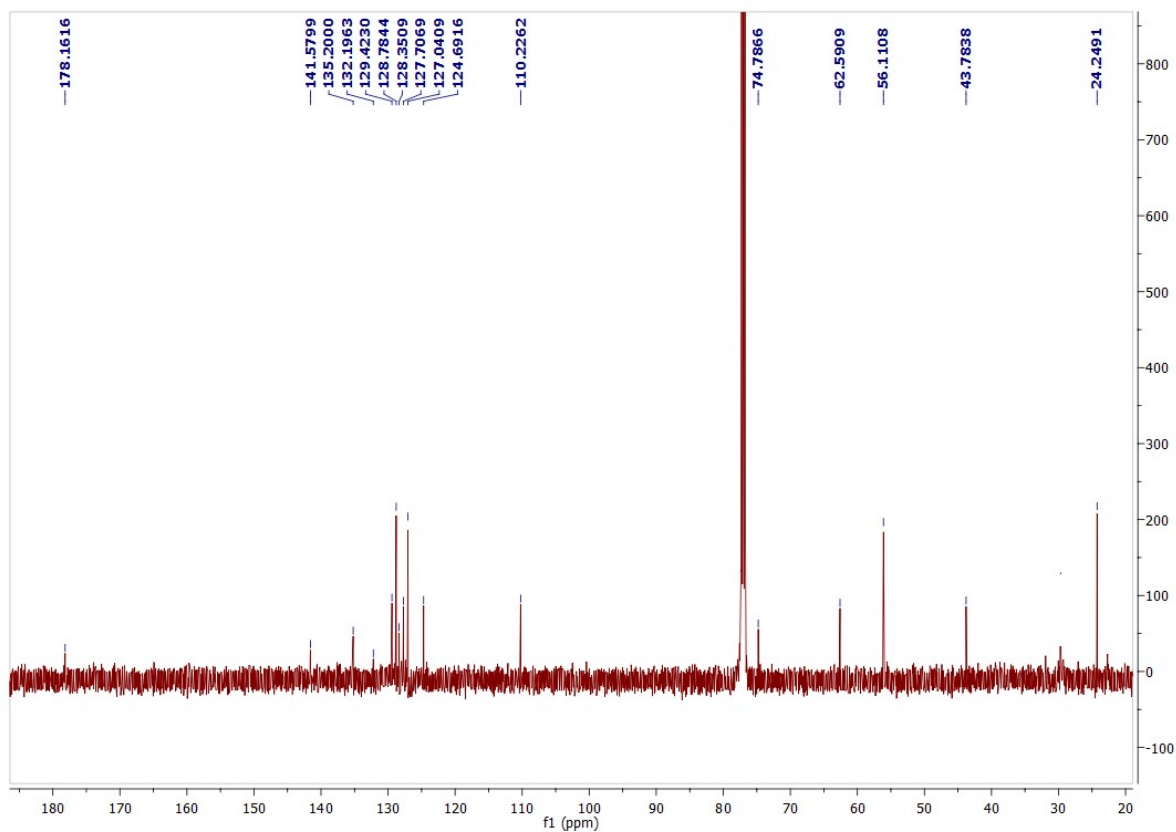

17. <sup>1</sup>H NMR 1-Benzyl-5,7-dibromo-3-hydroxy-3-(morpholinomethyl)indolin-2-one (**4j**)

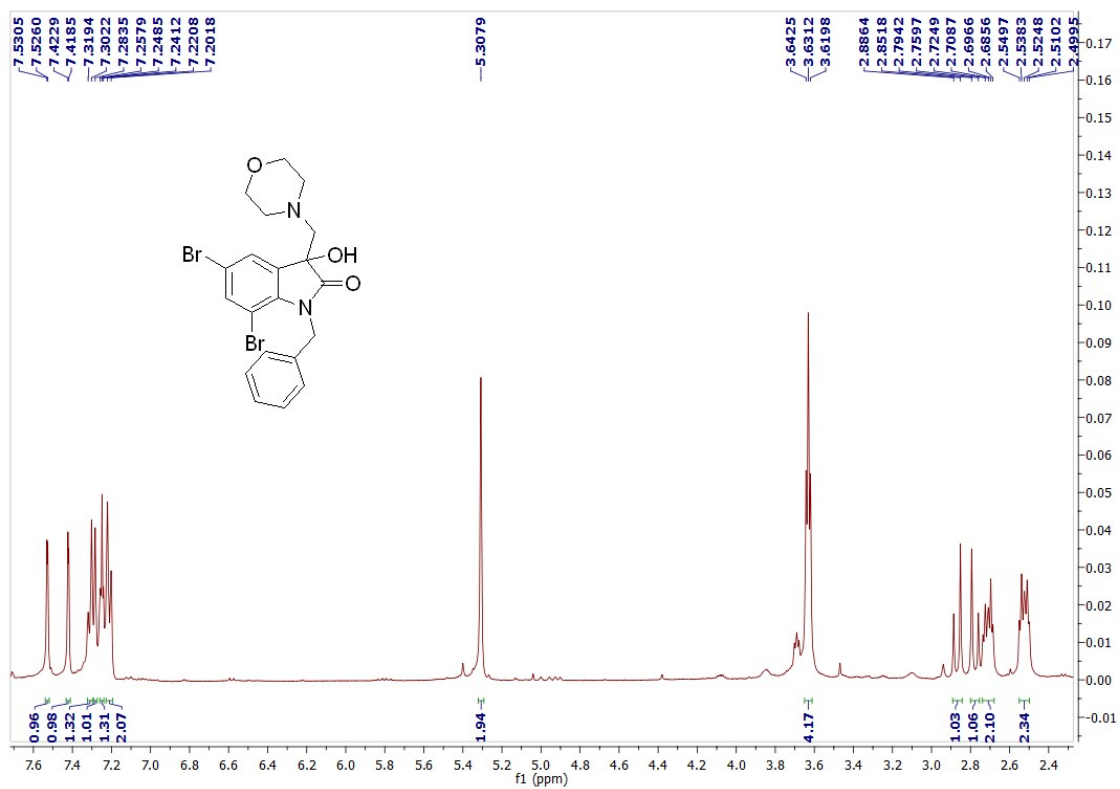

18.  $^{13}\text{C}$  NMR 1-Benzyl-5,7-dibromo-3-hydroxy-3-(morpholinomethyl)indolin-2-one (**4j**)

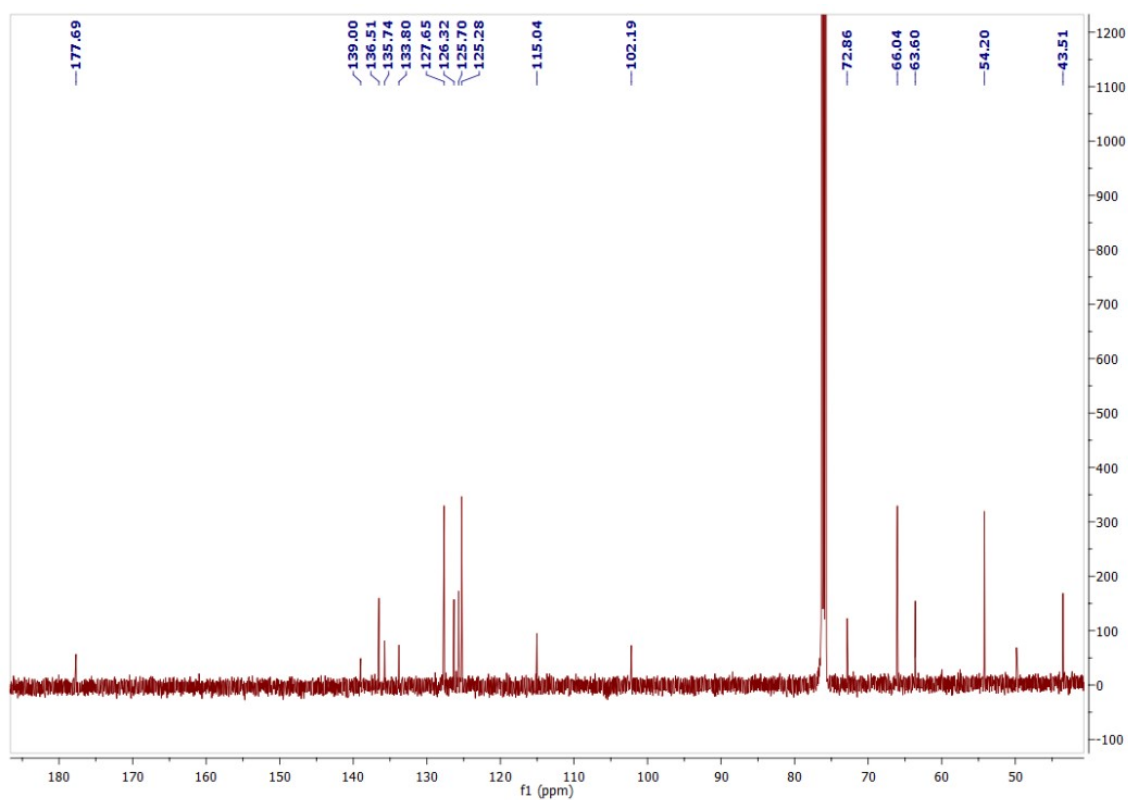

19.  $^1\text{H}$  NMR 1-Benzyl-5,7-dibromo-3-hydroxy-3-(piperidin-1-ylmethyl)indolin-2-one (**4k**)

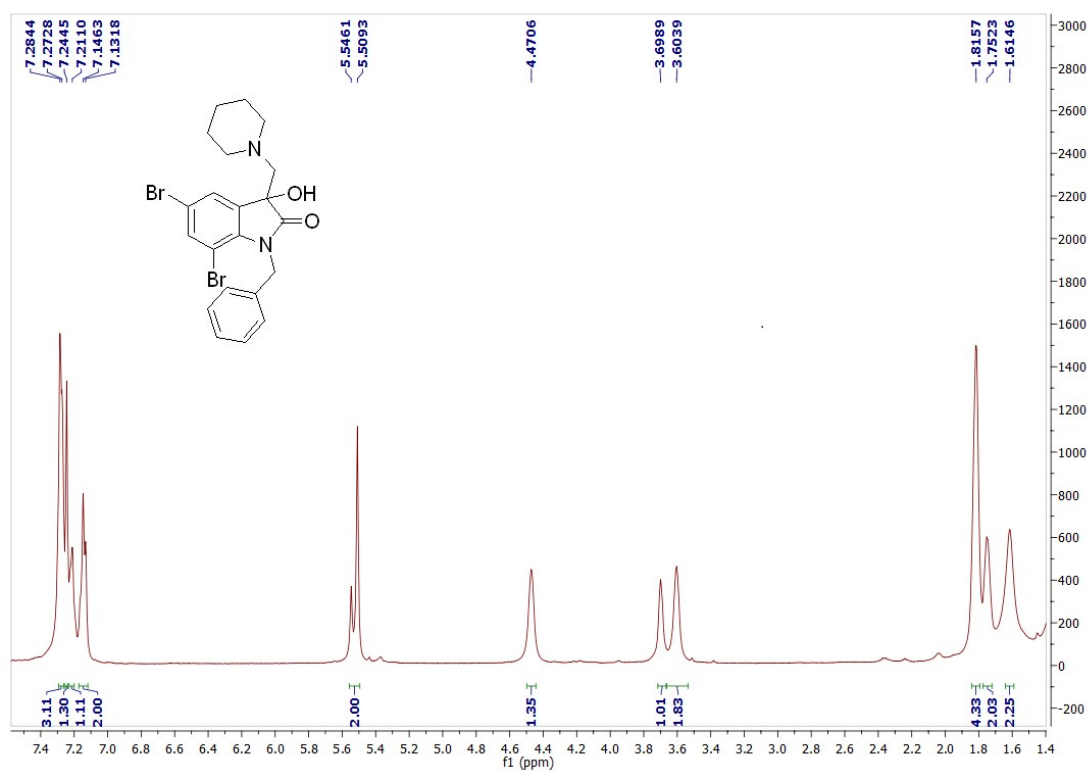

20.  $^{13}\text{C}$  NMR 1-Benzyl-5,7-dibromo-3-hydroxy-3-(piperidin-1-ylmethyl)indolin-2-one (**4k**)

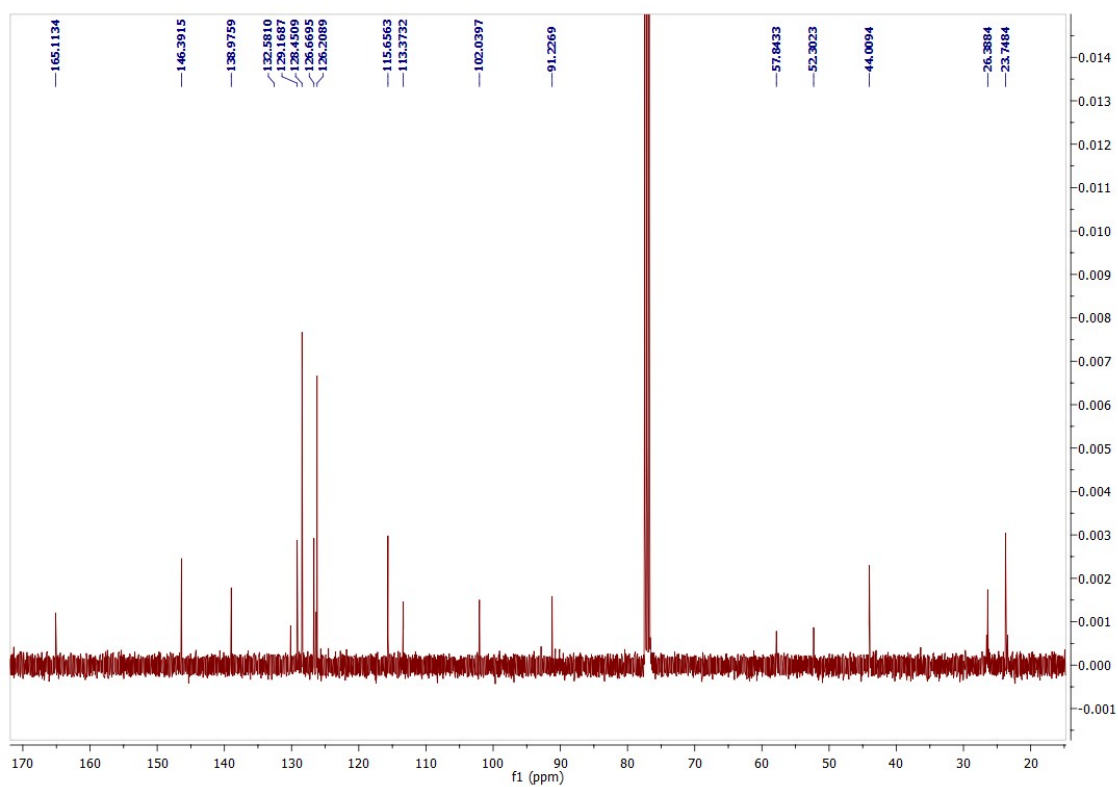

21.  $^1\text{H}$  NMR 3-Hydroxy-3-(morpholinomethyl)indolin-2-one (**4m**)

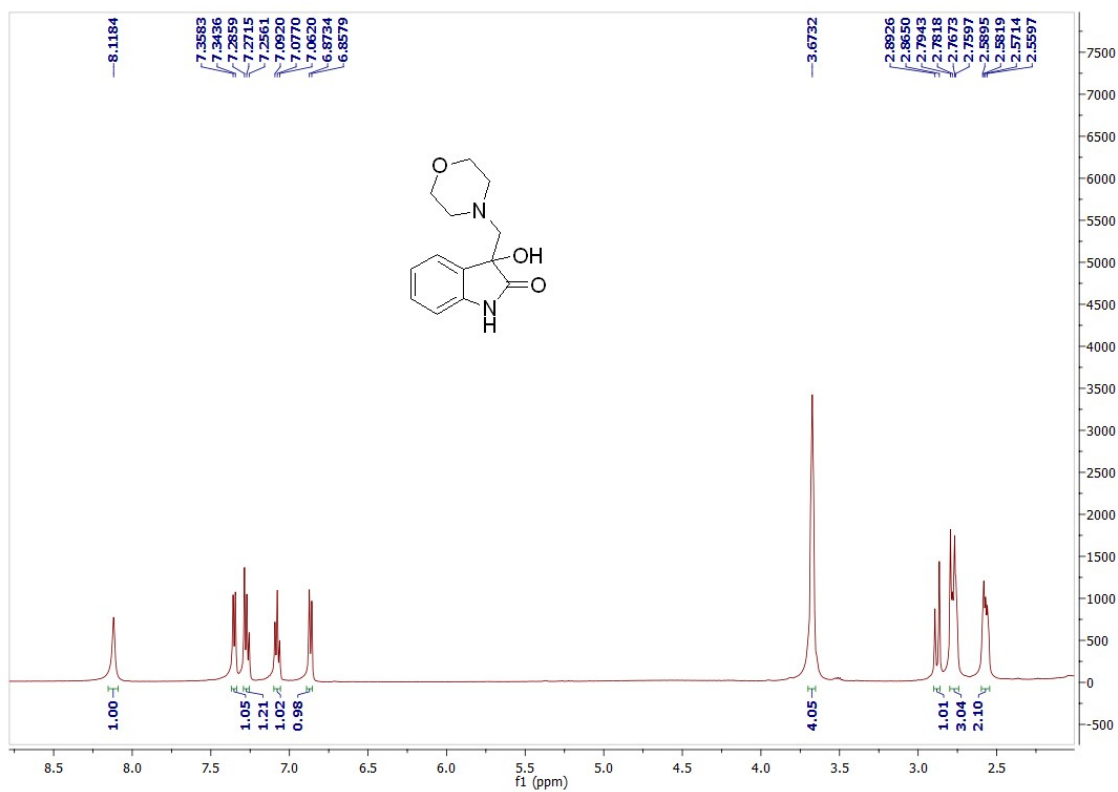

22.  $^{13}\text{C}$  NMR 3-Hydroxy-3-(morpholinomethyl)indolin-2-one (**4m**)

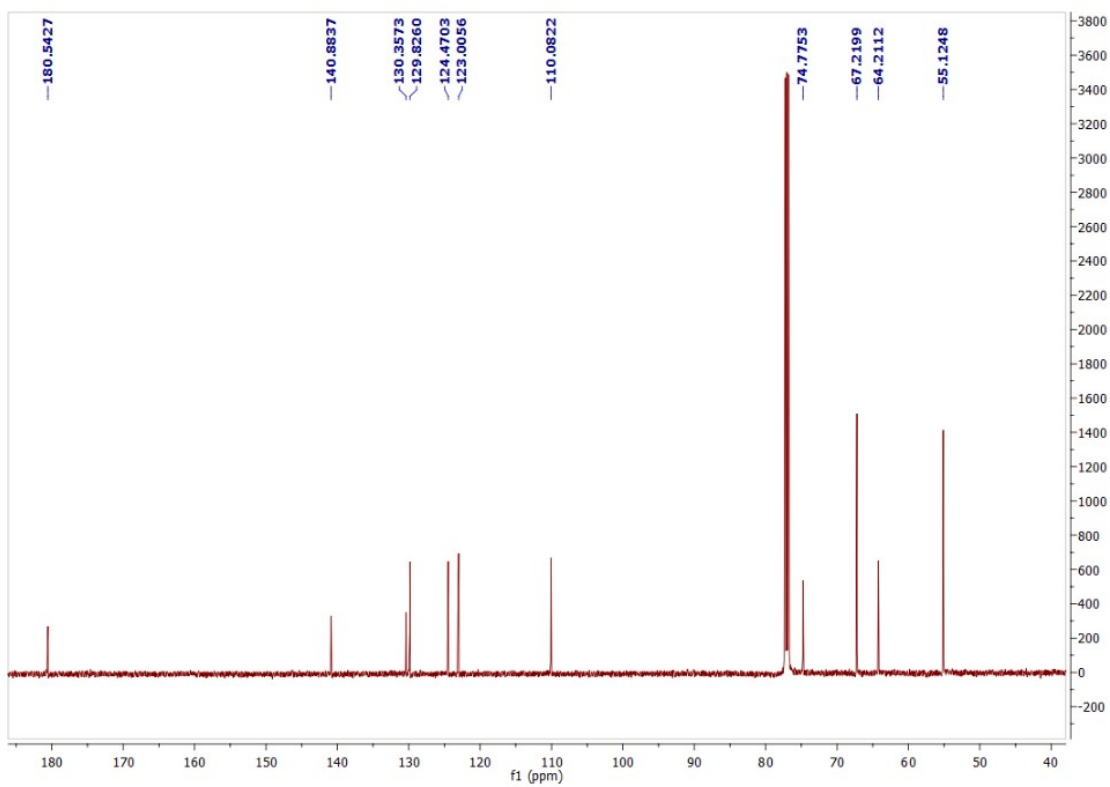

23.  $^1\text{H}$  NMR 3-Hydroxy-3-(piperidin-1-ylmethyl)indolin-2-one (**4n**)

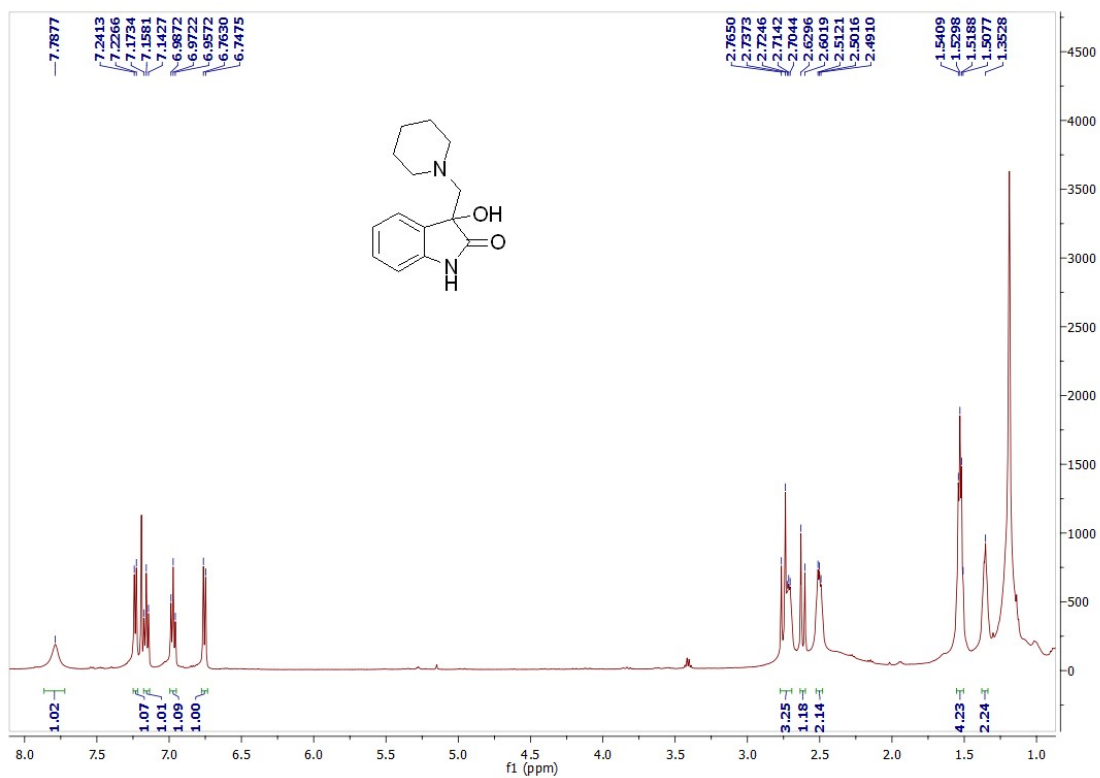

24.  $^{13}\text{C}$  NMR 3-Hydroxy-3-(piperidin-1-ylmethyl)indolin-2-one (**4n**)

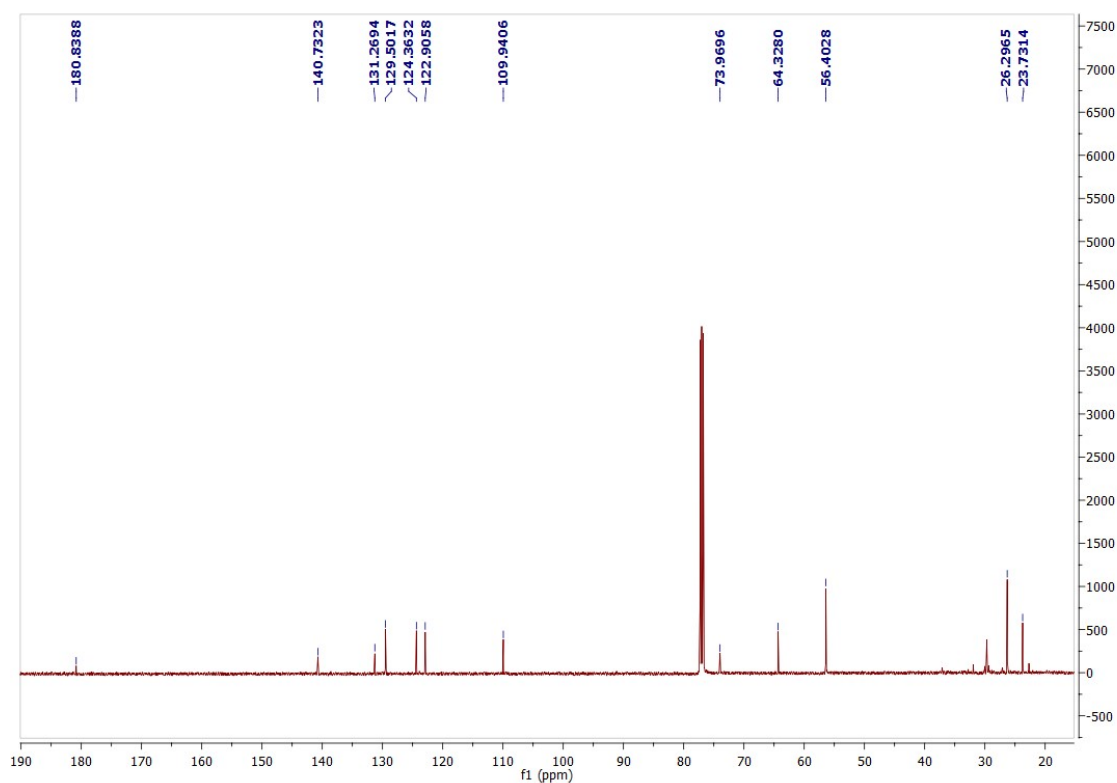

25.  $^1\text{H}$  NMR 3-Hydroxy-3-(pyrrolidin-1-ylmethyl)indolin-2-one (**4o**)

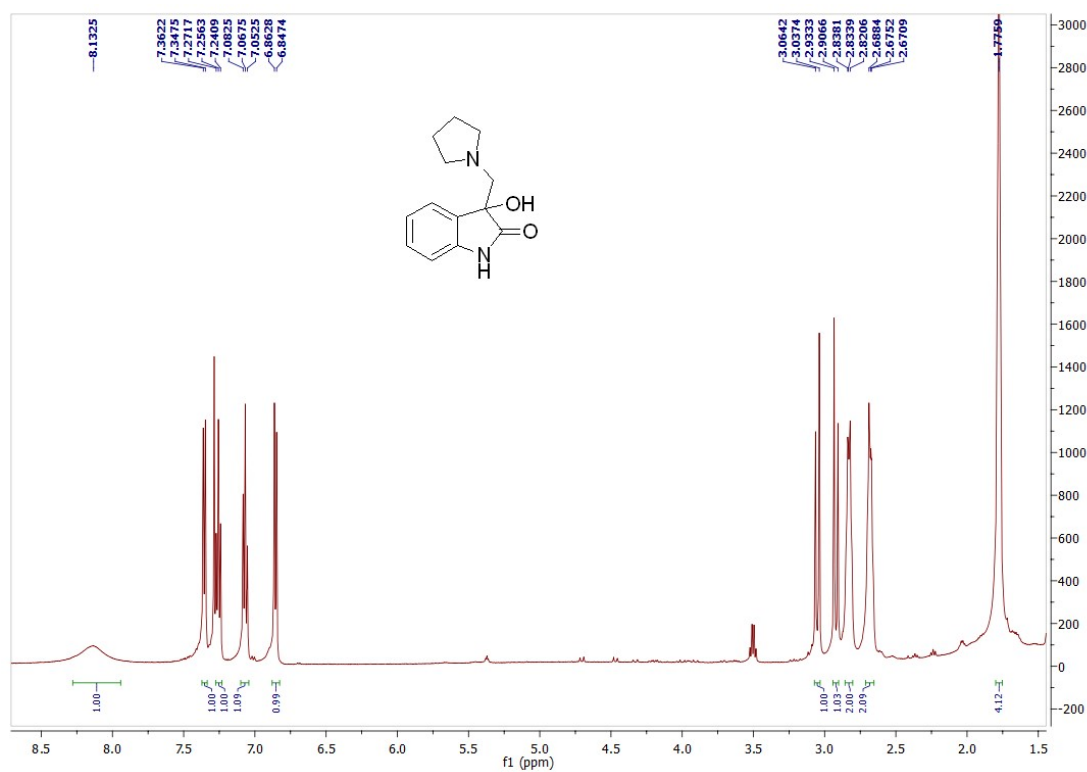

26. <sup>13</sup>C NMR 3-ydroxy-3-(pyrrolidin-1-ylmethyl)indolin-2-one (**4o**)

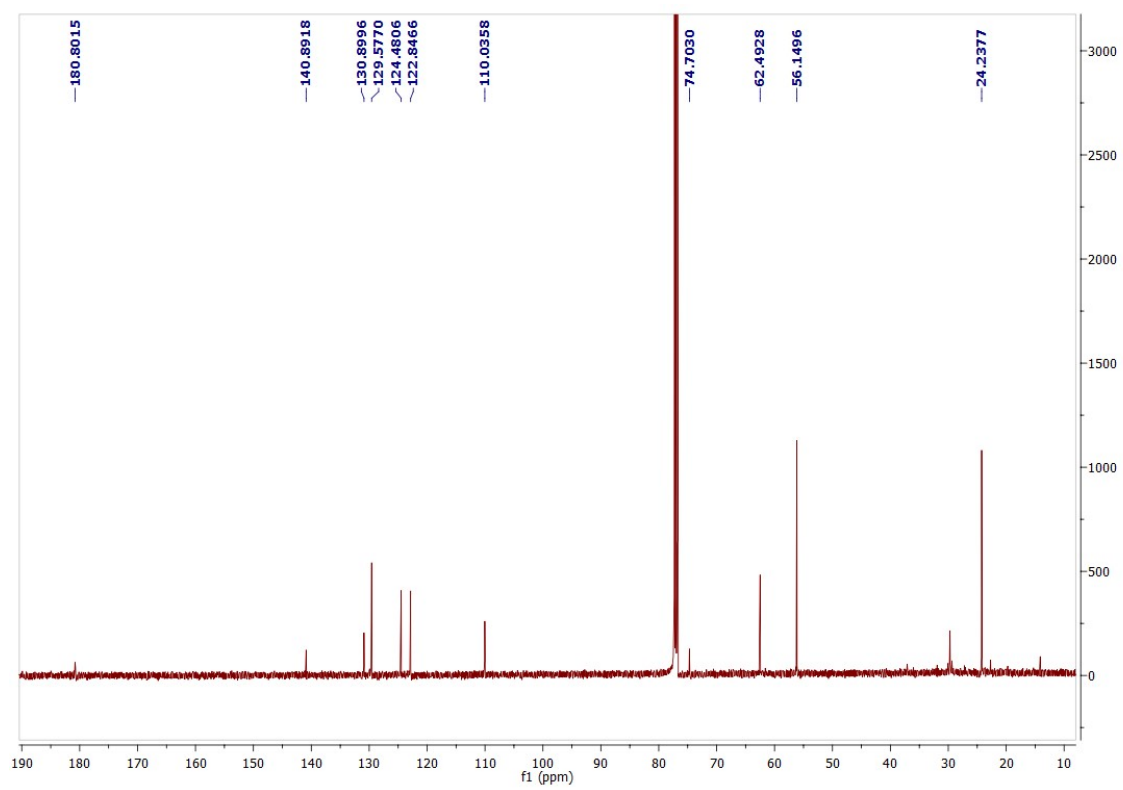

Supplement: d3ra05869g1.pdf [file d3ra05869g1.pdf]
